# Supplementary material for: Preparation and evaluation of polyethyleneimine-single walled carbon nanotube conjugates as vectors for pancreatic cancer treatment
Source: Royal Society of Chemistry journal article supplement (doi:10.1039/c4tb00778f), 2014-01-01
Supplement: c4tb00778f1.pdf [file c4tb00778f1.pdf]

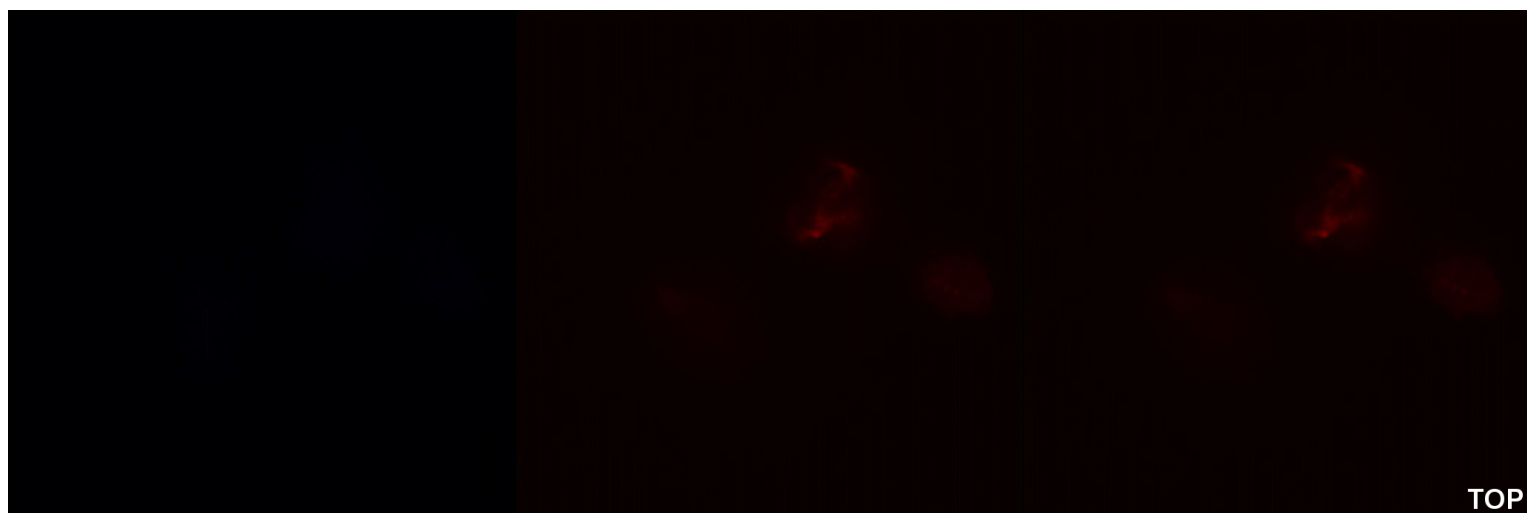

Z-stacking of laser confocal images of RhoB-PEI(1800)-cut-SWNTs in BxPC3 pancreatic cancer cells. The images were taken for DAPI for the nuclei (left) and rhodamine B for the nanotubes (center) stainings after 1 h incubation. The two images are superimposed to show that PEI(1800)-cut-SWNTs can enter the nuclei of BxPC3 pancreatic cancer cells (right).

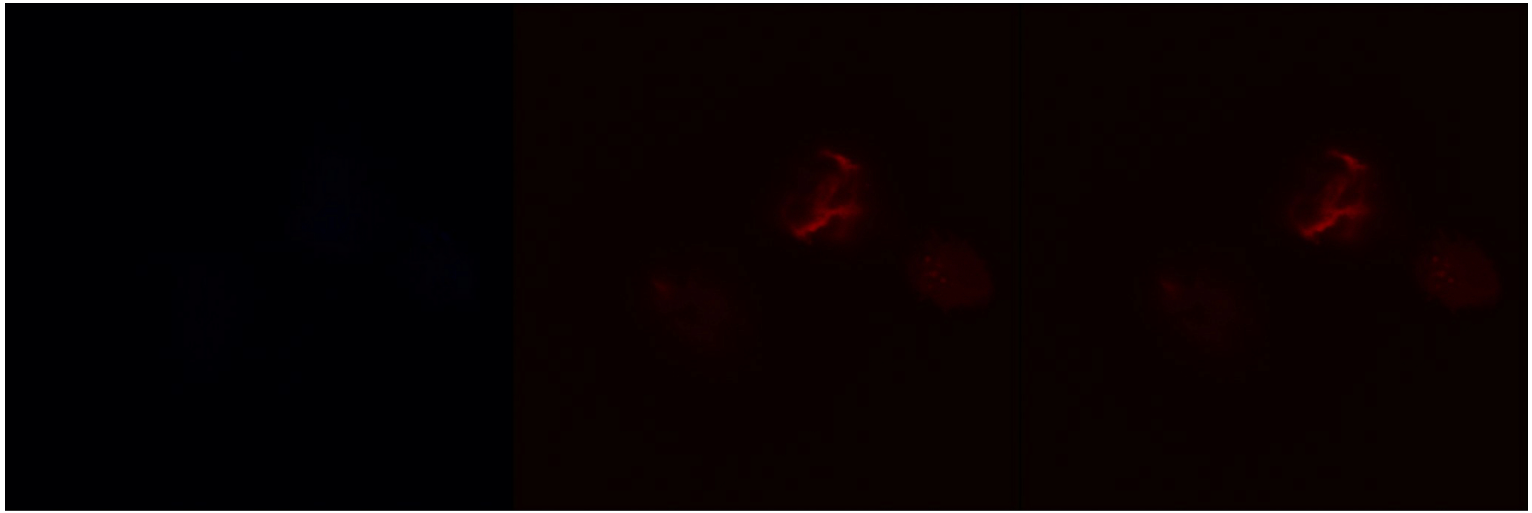

Z-stacking of laser confocal images of RhoB-PEI(1800)-cut-SWNTs in BxPC3 pancreatic cancer cells. The images were taken for DAPI for the nuclei (left) and rhodamine B for the nanotubes (center) stainings after 1 h incubation. The two images are superimposed to show that PEI(1800)-cut-SWNTs can enter the nuclei of BxPC3 pancreatic cancer cells (right).

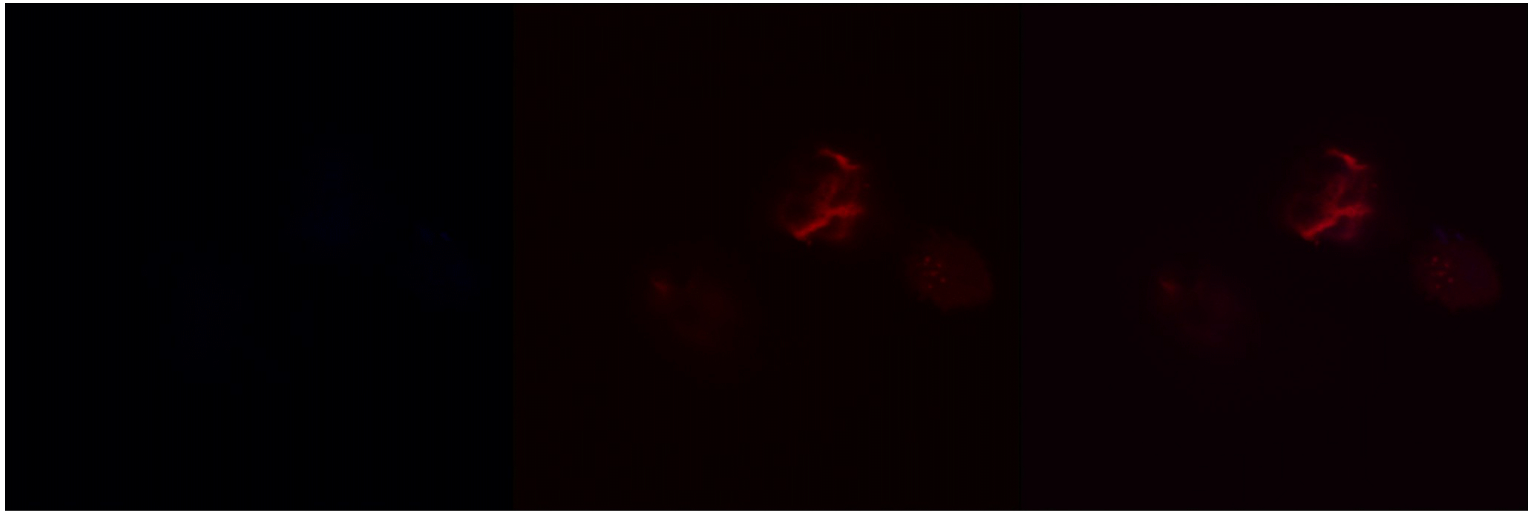

Z-stacking of laser confocal images of RhoB-PEI(1800)-cut-SWNTs in BxPC3 pancreatic cancer cells. The images were taken for DAPI for the nuclei (left) and rhodamine B for the nanotubes (center) stainings after 1 h incubation. The two images are superimposed to show that PEI(1800)-cut-SWNTs can enter the nuclei of BxPC3 pancreatic cancer cells (right).

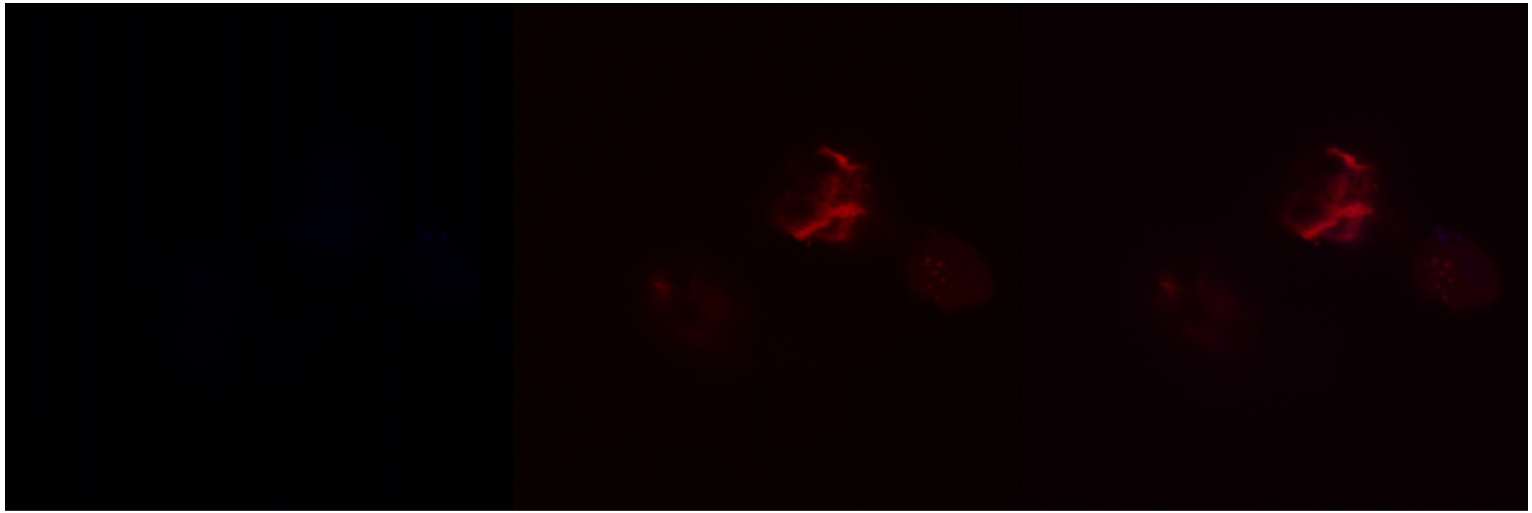

Z-stacking of laser confocal images of RhoB-PEI(1800)-cut-SWNTs in BxPC3 pancreatic cancer cells. The images were taken for DAPI for the nuclei (left) and rhodamine B for the nanotubes (center) stainings after 1 h incubation. The two images are superimposed to show that PEI(1800)-cut-SWNTs can enter the nuclei of BxPC3 pancreatic cancer cells (right).

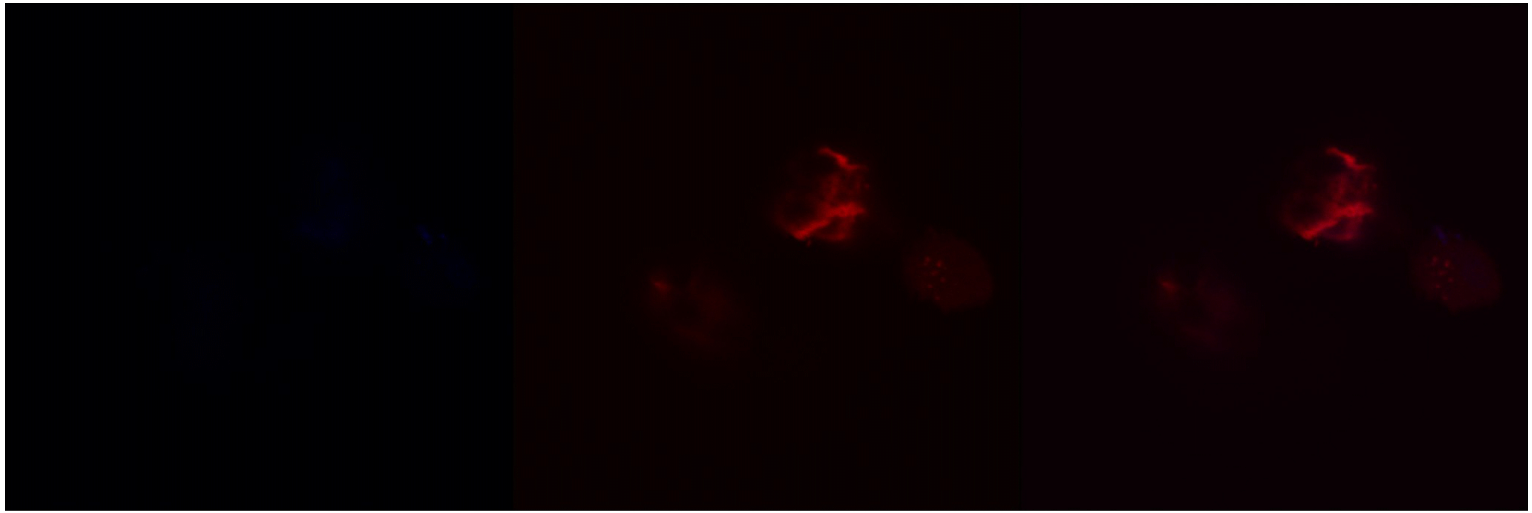

Z-stacking of laser confocal images of RhoB-PEI(1800)-cut-SWNTs in BxPC3 pancreatic cancer cells. The images were taken for DAPI for the nuclei (left) and rhodamine B for the nanotubes (center) stainings after 1 h incubation. The two images are superimposed to show that PEI(1800)-cut-SWNTs can enter the nuclei of BxPC3 pancreatic cancer cells (right).

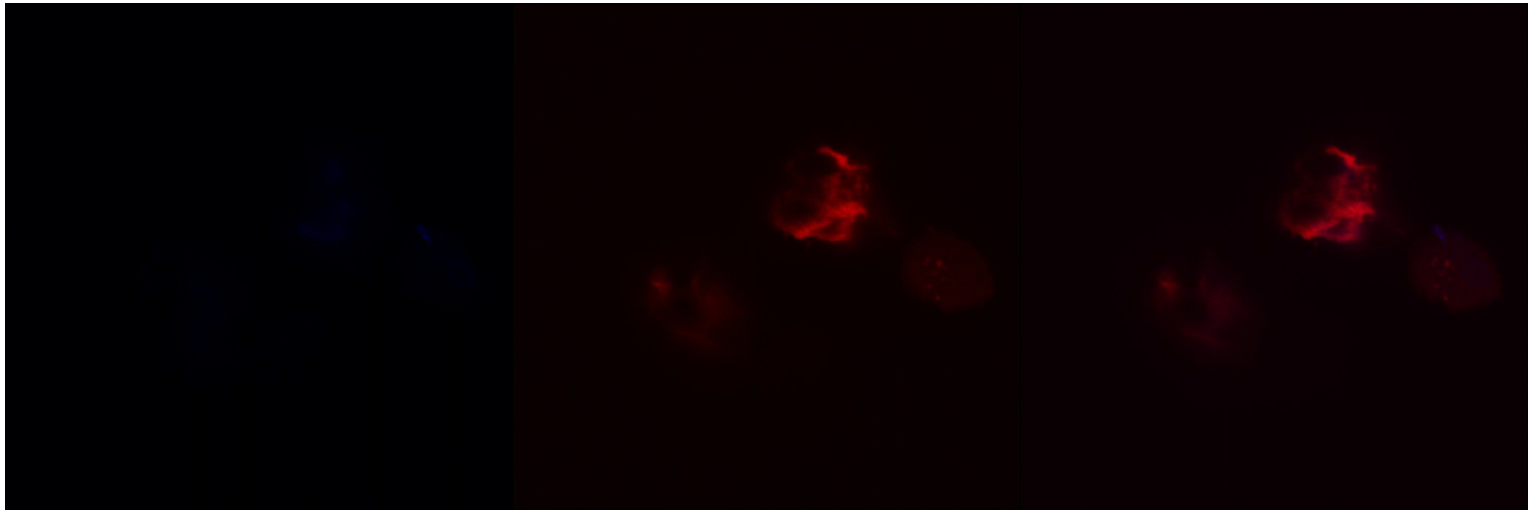

Z-stacking of laser confocal images of RhoB-PEI(1800)-cut-SWNTs in BxPC3 pancreatic cancer cells. The images were taken for DAPI for the nuclei (left) and rhodamine B for the nanotubes (center) stainings after 1 h incubation. The two images are superimposed to show that PEI(1800)-cut-SWNTs can enter the nuclei of BxPC3 pancreatic cancer cells (right).

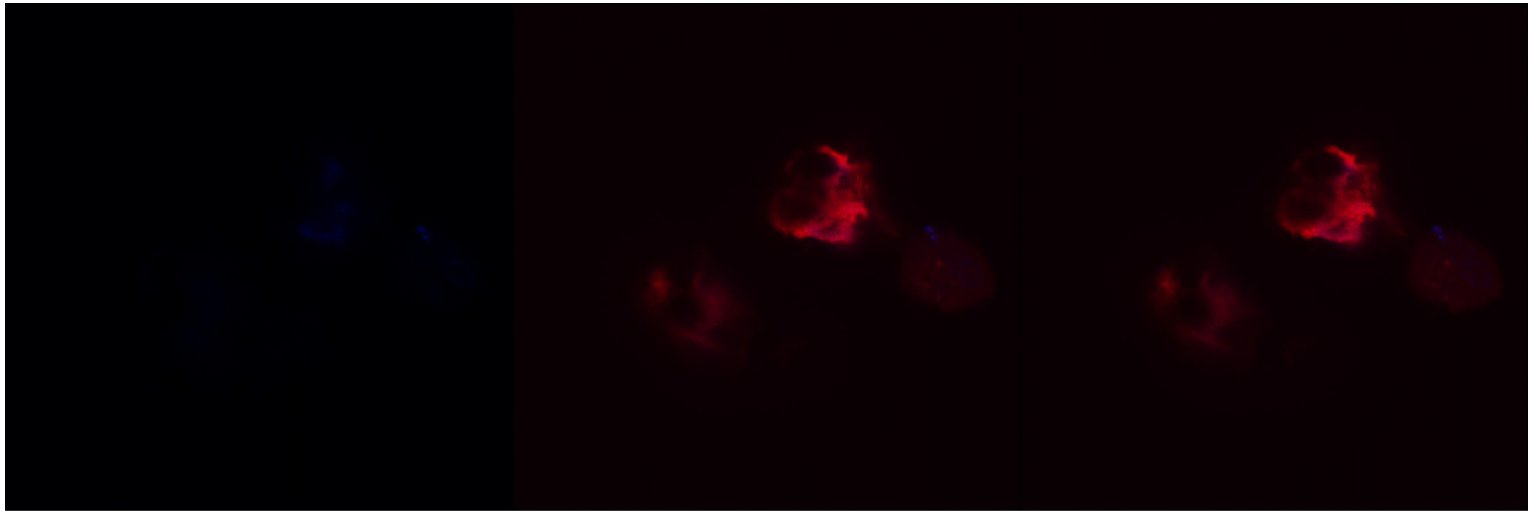

Z-stacking of laser confocal images of RhoB-PEI(1800)-cut-SWNTs in BxPC3 pancreatic cancer cells. The images were taken for DAPI for the nuclei (left) and rhodamine B for the nanotubes (center) stainings after 1 h incubation. The two images are superimposed to show that PEI(1800)-cut-SWNTs can enter the nuclei of BxPC3 pancreatic cancer cells (right).

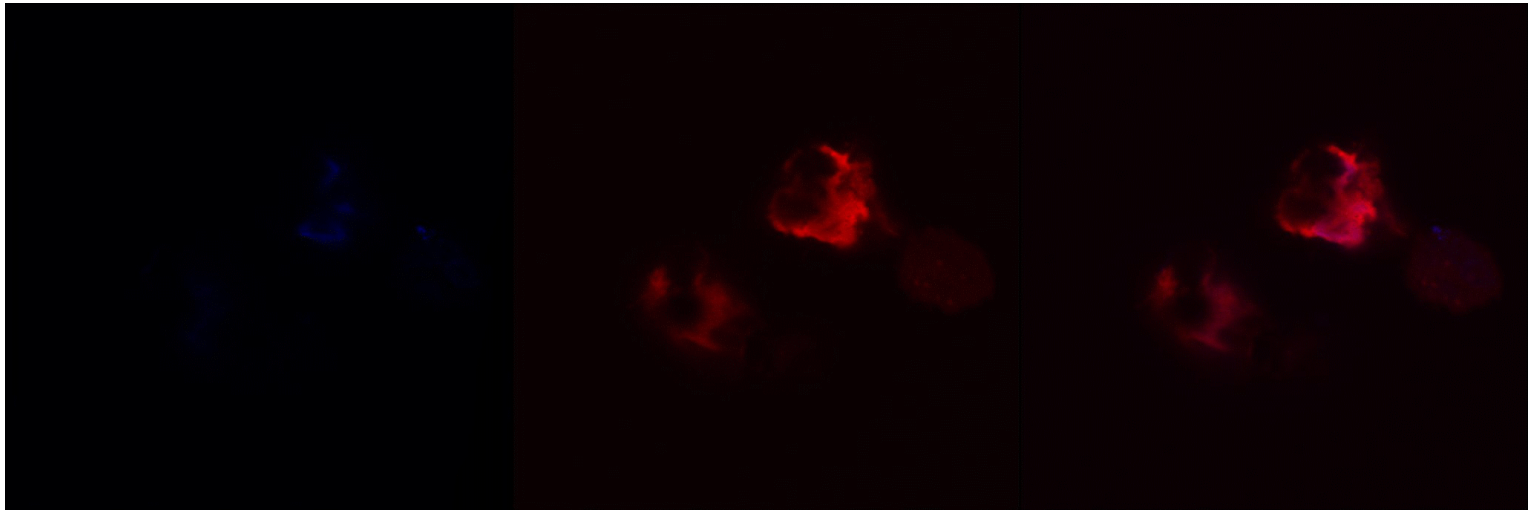

Z-stacking of laser confocal images of RhoB-PEI(1800)-cut-SWNTs in BxPC3 pancreatic cancer cells. The images were taken for DAPI for the nuclei (left) and rhodamine B for the nanotubes (center) stainings after 1 h incubation. The two images are superimposed to show that PEI(1800)-cut-SWNTs can enter the nuclei of BxPC3 pancreatic cancer cells (right).

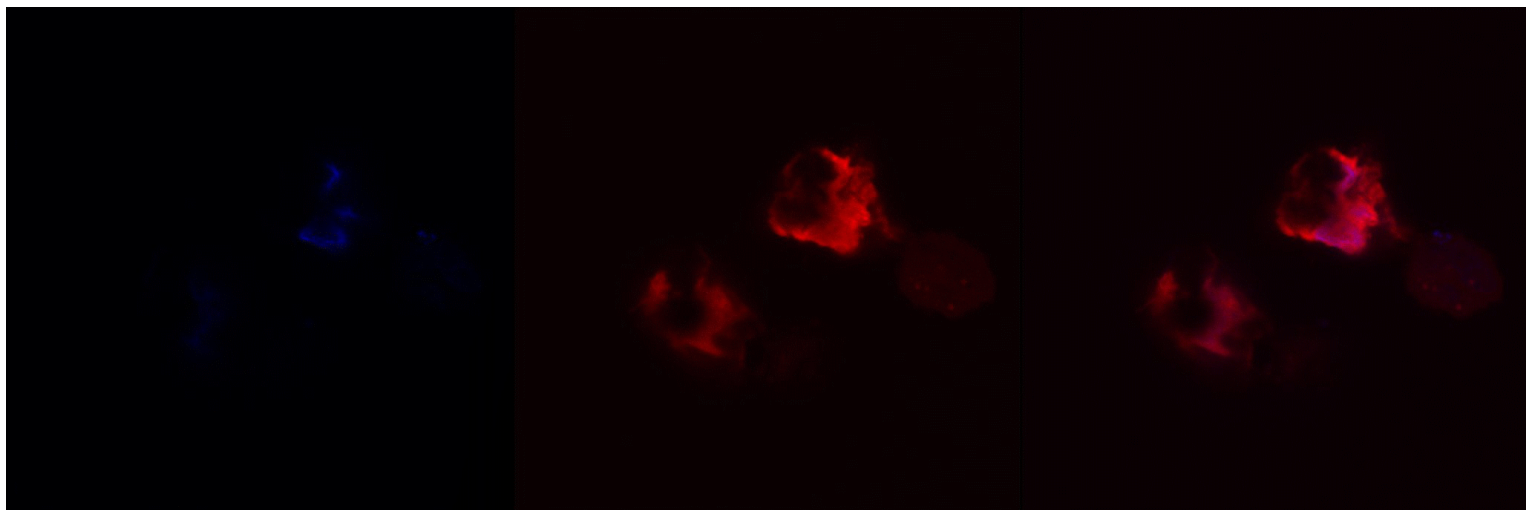

Z-stacking of laser confocal images of RhoB-PEI(1800)-cut-SWNTs in BxPC3 pancreatic cancer cells. The images were taken for DAPI for the nuclei (left) and rhodamine B for the nanotubes (center) stainings after 1 h incubation. The two images are superimposed to show that PEI(1800)-cut-SWNTs can enter the nuclei of BxPC3 pancreatic cancer cells (right).

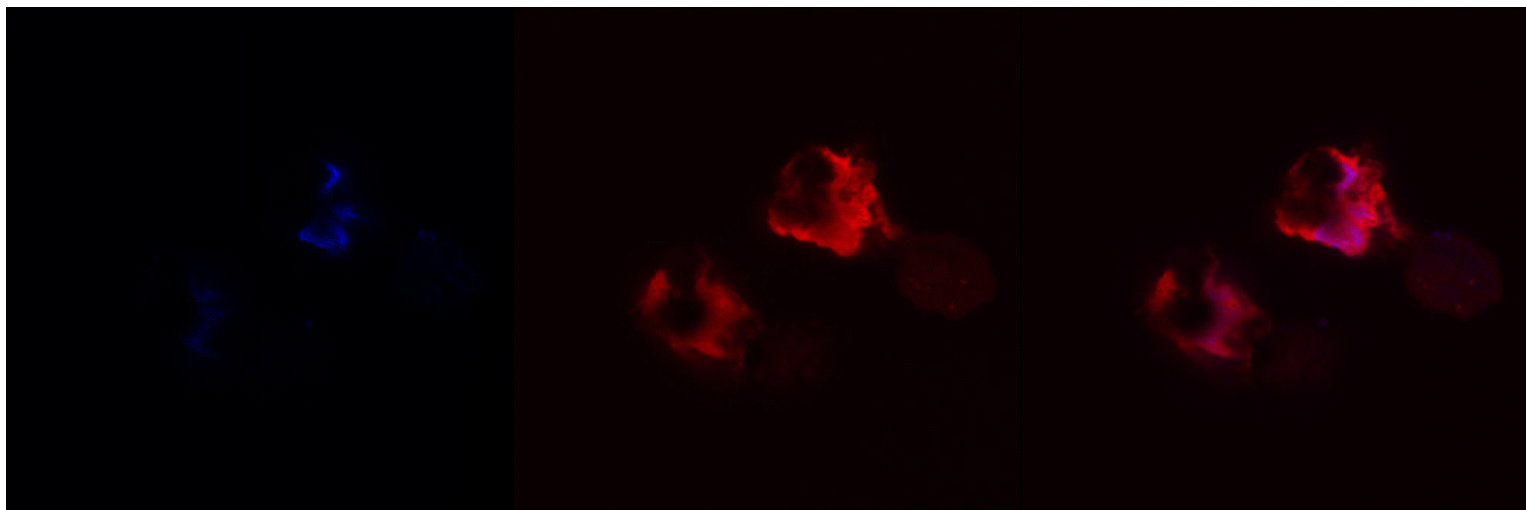

Z-stacking of laser confocal images of RhoB-PEI(1800)-cut-SWNTs in BxPC3 pancreatic cancer cells. The images were taken for DAPI for the nuclei (left) and rhodamine B for the nanotubes (center) stainings after 1 h incubation. The two images are superimposed to show that PEI(1800)-cut-SWNTs can enter the nuclei of BxPC3 pancreatic cancer cells (right).

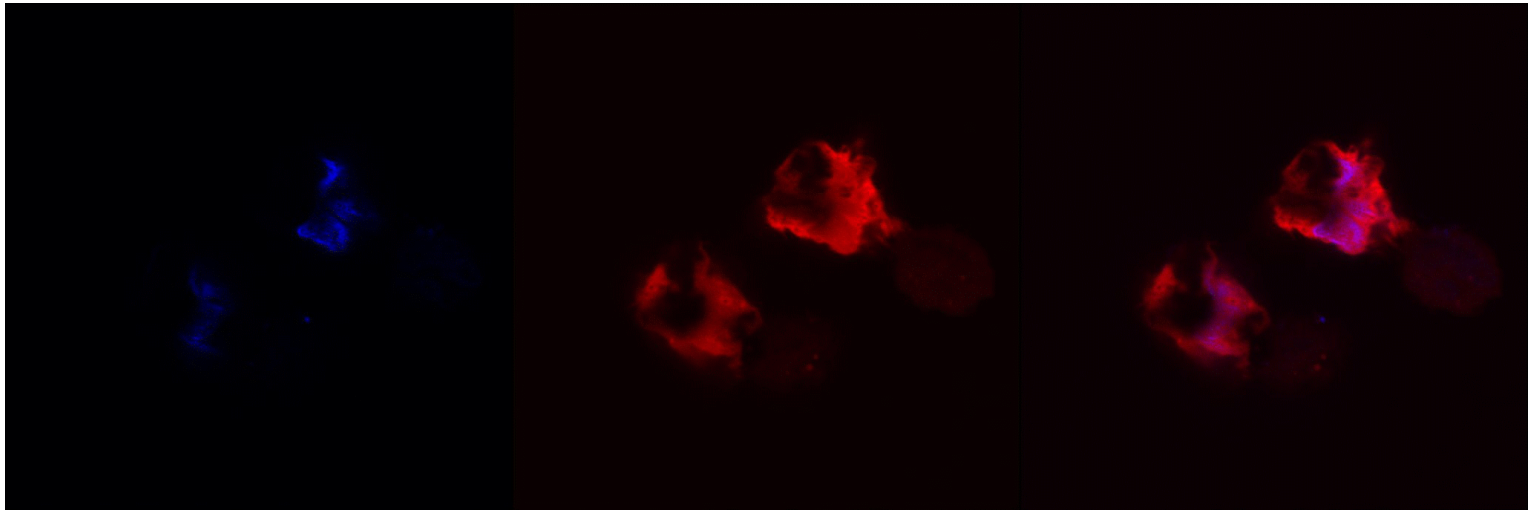

Z-stacking of laser confocal images of RhoB-PEI(1800)-cut-SWNTs in BxPC3 pancreatic cancer cells. The images were taken for DAPI for the nuclei (left) and rhodamine B for the nanotubes (center) stainings after 1 h incubation. The two images are superimposed to show that PEI(1800)-cut-SWNTs can enter the nuclei of BxPC3 pancreatic cancer cells (right).

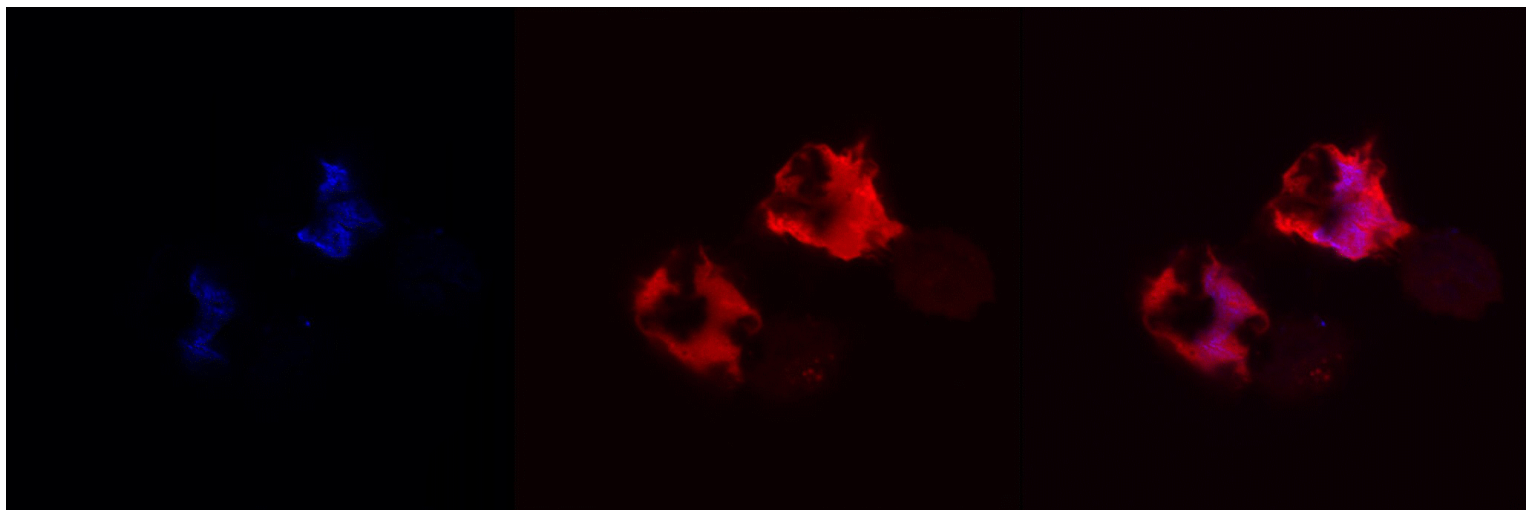

Z-stacking of laser confocal images of RhoB-PEI(1800)-cut-SWNTs in BxPC3 pancreatic cancer cells. The images were taken for DAPI for the nuclei (left) and rhodamine B for the nanotubes (center) stainings after 1 h incubation. The two images are superimposed to show that PEI(1800)-cut-SWNTs can enter the nuclei of BxPC3 pancreatic cancer cells (right).

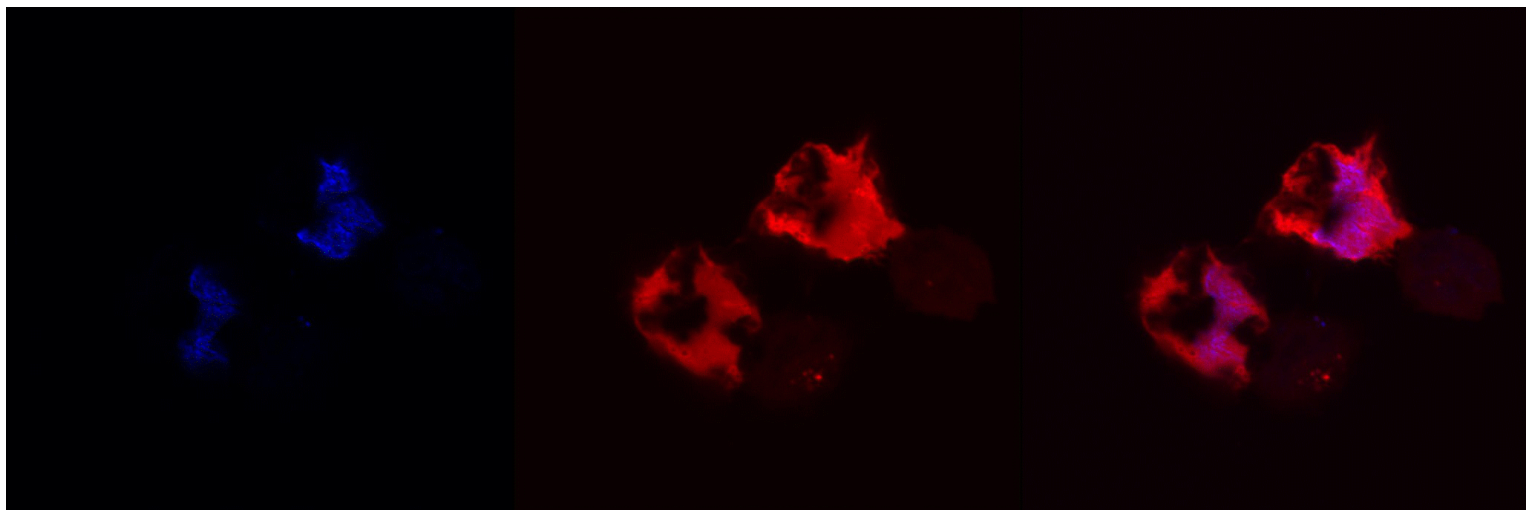

Z-stacking of laser confocal images of RhoB-PEI(1800)-cut-SWNTs in BxPC3 pancreatic cancer cells. The images were taken for DAPI for the nuclei (left) and rhodamine B for the nanotubes (center) stainings after 1 h incubation. The two images are superimposed to show that PEI(1800)-cut-SWNTs can enter the nuclei of BxPC3 pancreatic cancer cells (right).

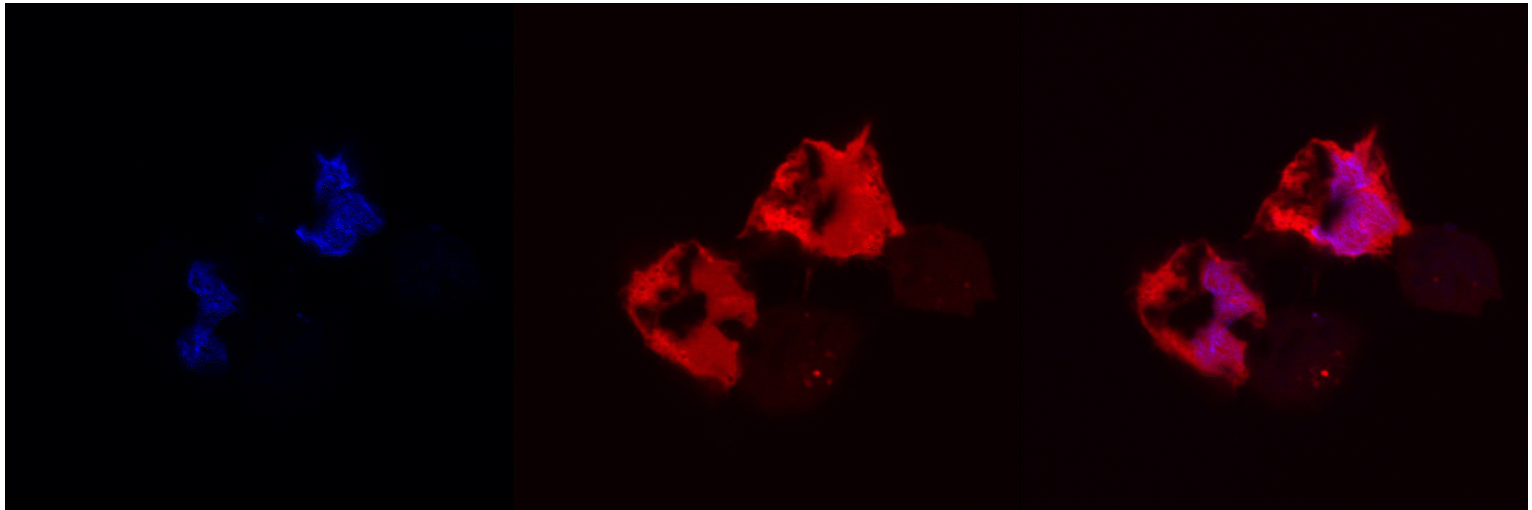

Z-stacking of laser confocal images of RhoB-PEI(1800)-cut-SWNTs in BxPC3 pancreatic cancer cells. The images were taken for DAPI for the nuclei (left) and rhodamine B for the nanotubes (center) stainings after 1 h incubation. The two images are superimposed to show that PEI(1800)-cut-SWNTs can enter the nuclei of BxPC3 pancreatic cancer cells (right).

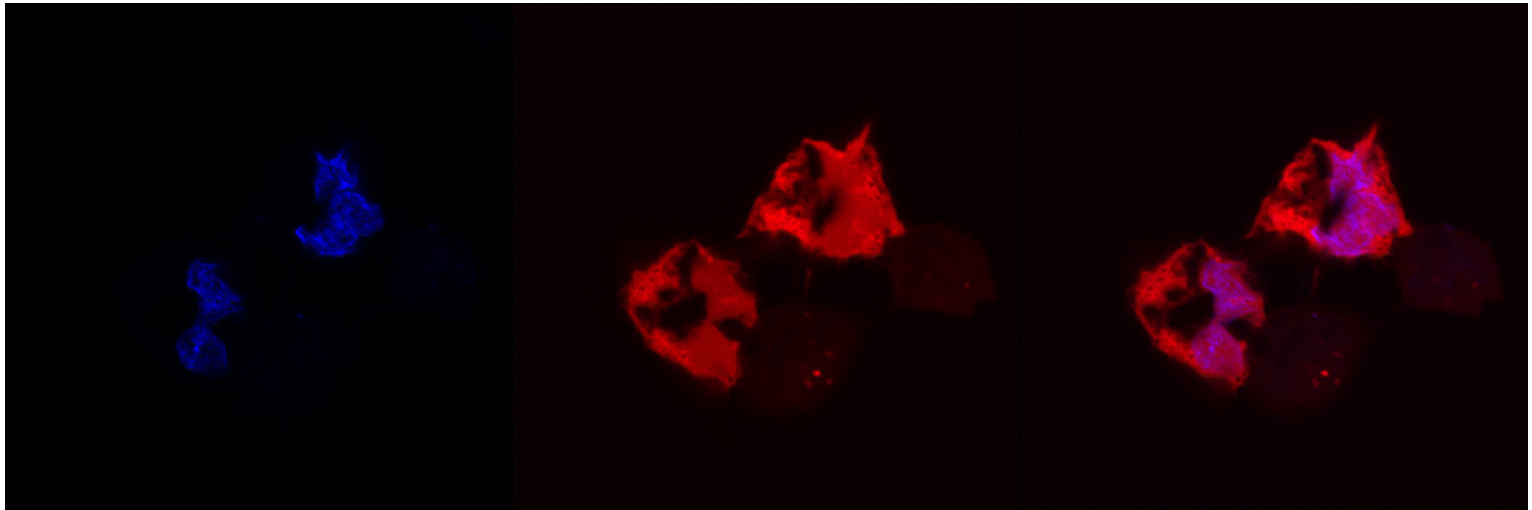

Z-stacking of laser confocal images of RhoB-PEI(1800)-cut-SWNTs in BxPC3 pancreatic cancer cells. The images were taken for DAPI for the nuclei (left) and rhodamine B for the nanotubes (center) stainings after 1 h incubation. The two images are superimposed to show that PEI(1800)-cut-SWNTs can enter the nuclei of BxPC3 pancreatic cancer cells (right).

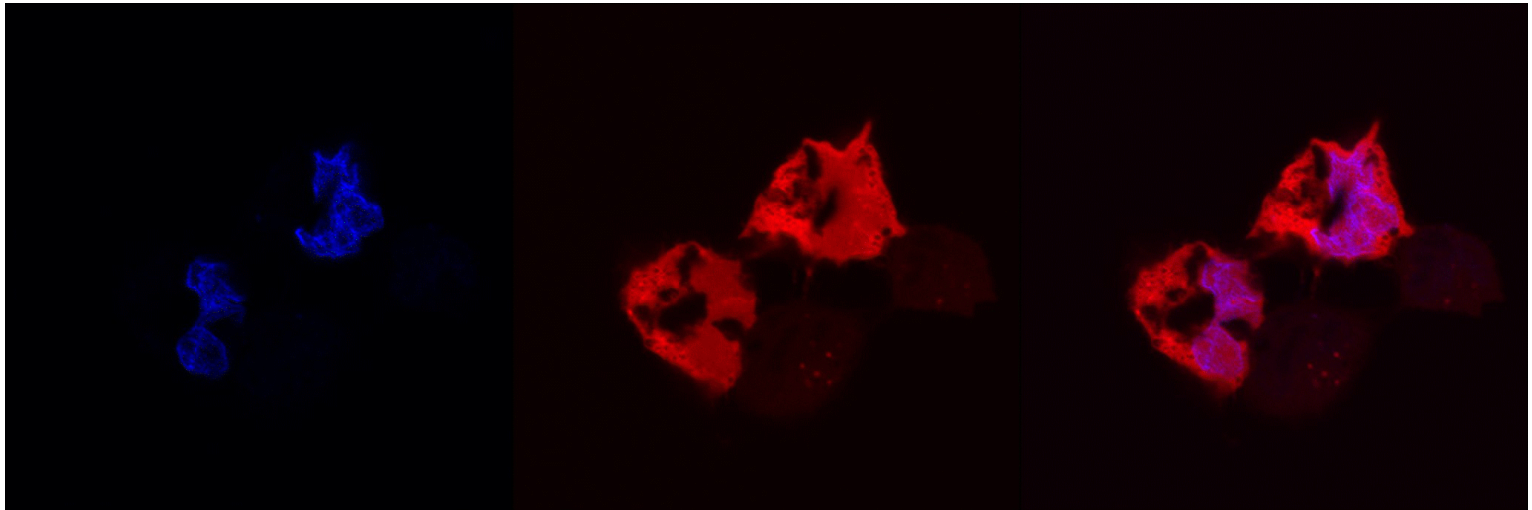

Z-stacking of laser confocal images of RhoB-PEI(1800)-cut-SWNTs in BxPC3 pancreatic cancer cells. The images were taken for DAPI for the nuclei (left) and rhodamine B for the nanotubes (center) stainings after 1 h incubation. The two images are superimposed to show that PEI(1800)-cut-SWNTs can enter the nuclei of BxPC3 pancreatic cancer cells (right).

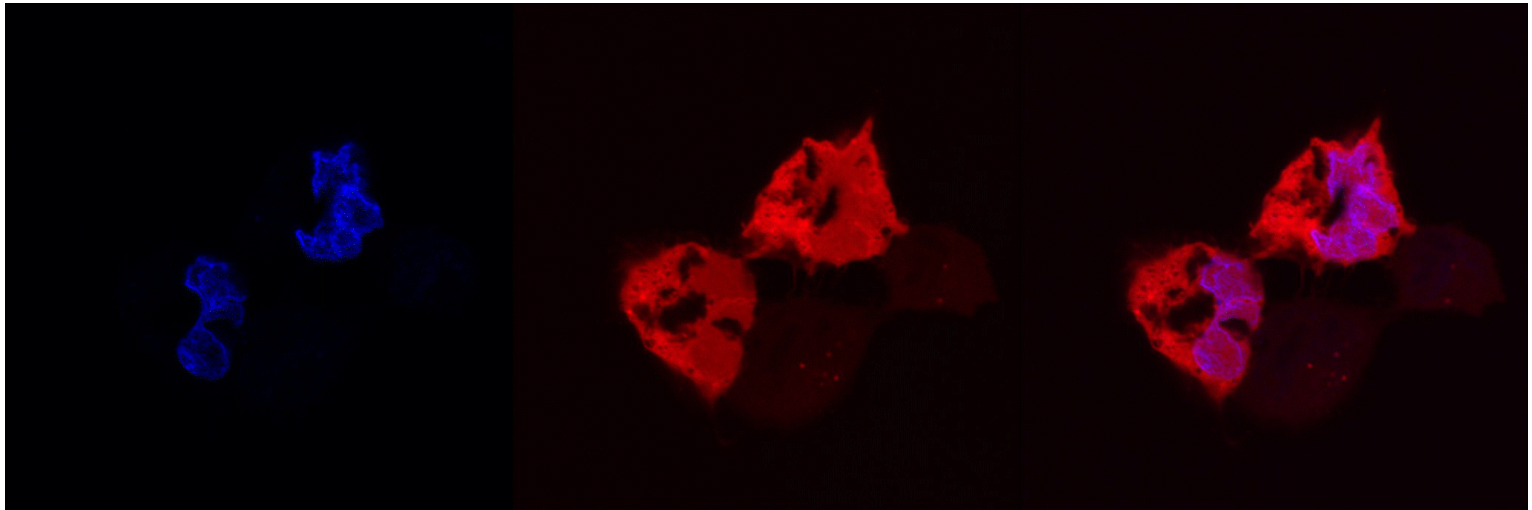

Z-stacking of laser confocal images of RhoB-PEI(1800)-cut-SWNTs in BxPC3 pancreatic cancer cells. The images were taken for DAPI for the nuclei (left) and rhodamine B for the nanotubes (center) stainings after 1 h incubation. The two images are superimposed to show that PEI(1800)-cut-SWNTs can enter the nuclei of BxPC3 pancreatic cancer cells (right).

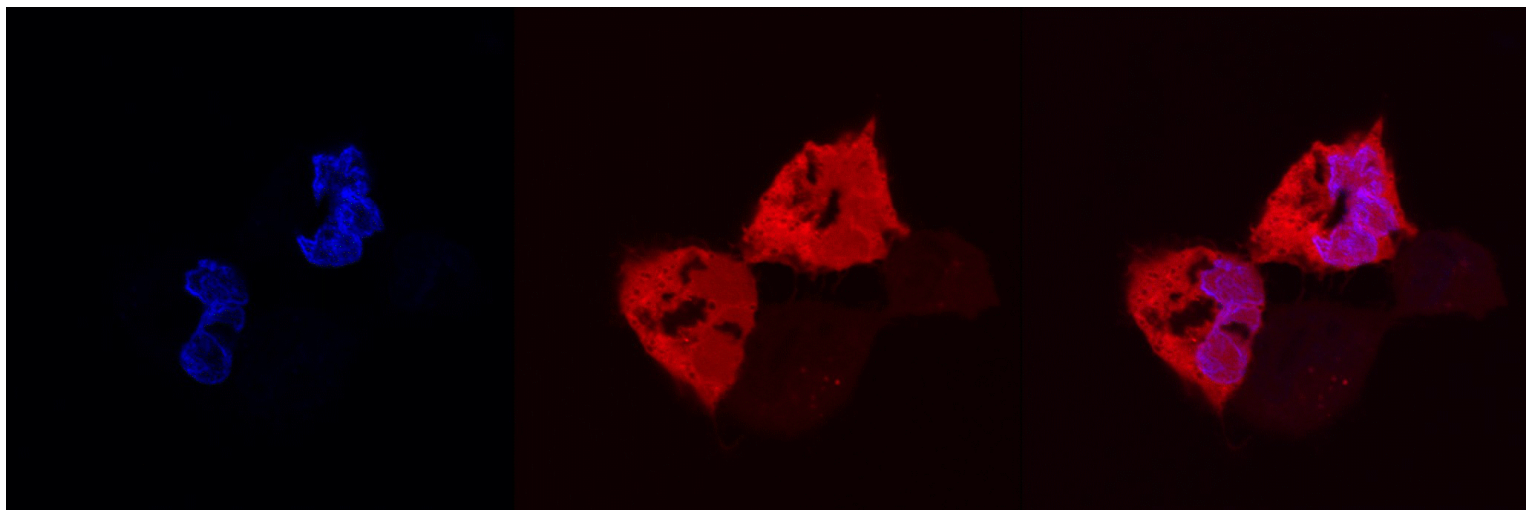

Z-stacking of laser confocal images of RhoB-PEI(1800)-cut-SWNTs in BxPC3 pancreatic cancer cells. The images were taken for DAPI for the nuclei (left) and rhodamine B for the nanotubes (center) stainings after 1 h incubation. The two images are superimposed to show that PEI(1800)-cut-SWNTs can enter the nuclei of BxPC3 pancreatic cancer cells (right).

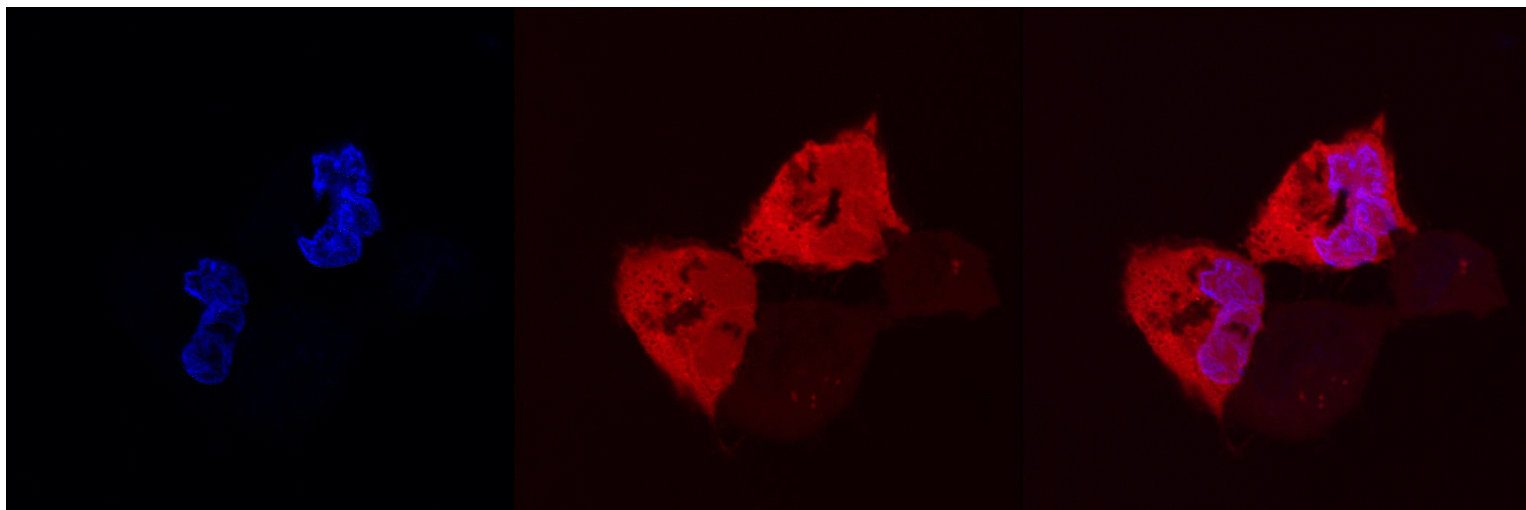

Z-stacking of laser confocal images of RhoB-PEI(1800)-cut-SWNTs in BxPC3 pancreatic cancer cells. The images were taken for DAPI for the nuclei (left) and rhodamine B for the nanotubes (center) stainings after 1 h incubation. The two images are superimposed to show that PEI(1800)-cut-SWNTs can enter the nuclei of BxPC3 pancreatic cancer cells (right).

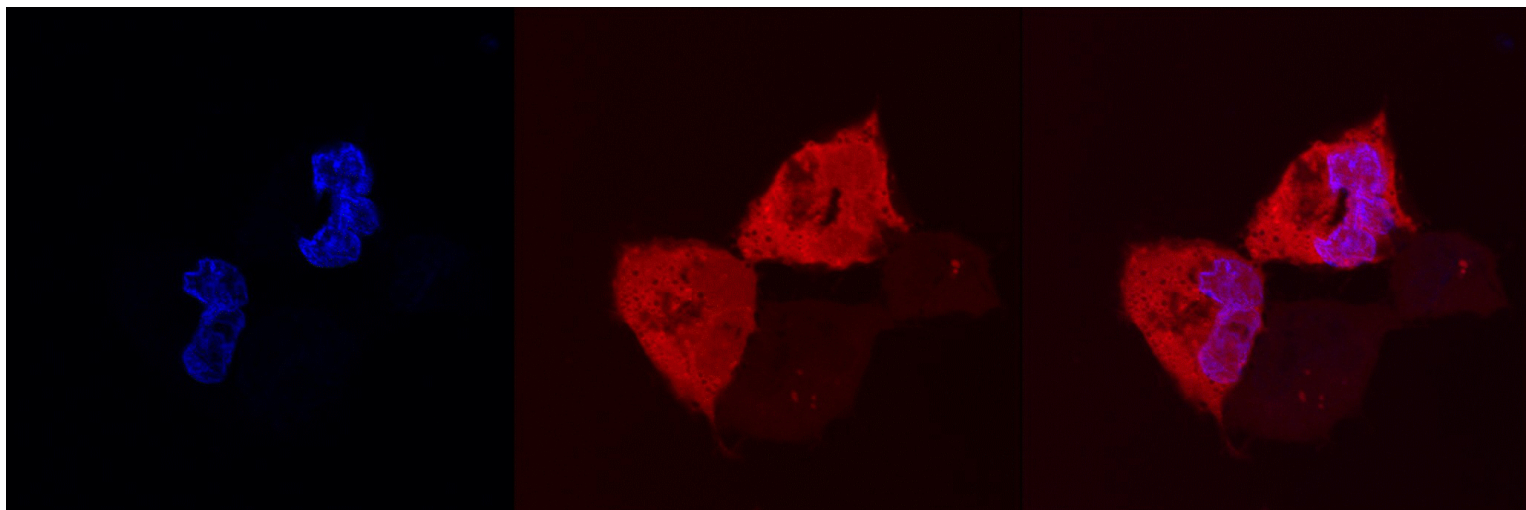

Z-stacking of laser confocal images of RhoB-PEI(1800)-cut-SWNTs in BxPC3 pancreatic cancer cells. The images were taken for DAPI for the nuclei (left) and rhodamine B for the nanotubes (center) stainings after 1 h incubation. The two images are superimposed to show that PEI(1800)-cut-SWNTs can enter the nuclei of BxPC3 pancreatic cancer cells (right).

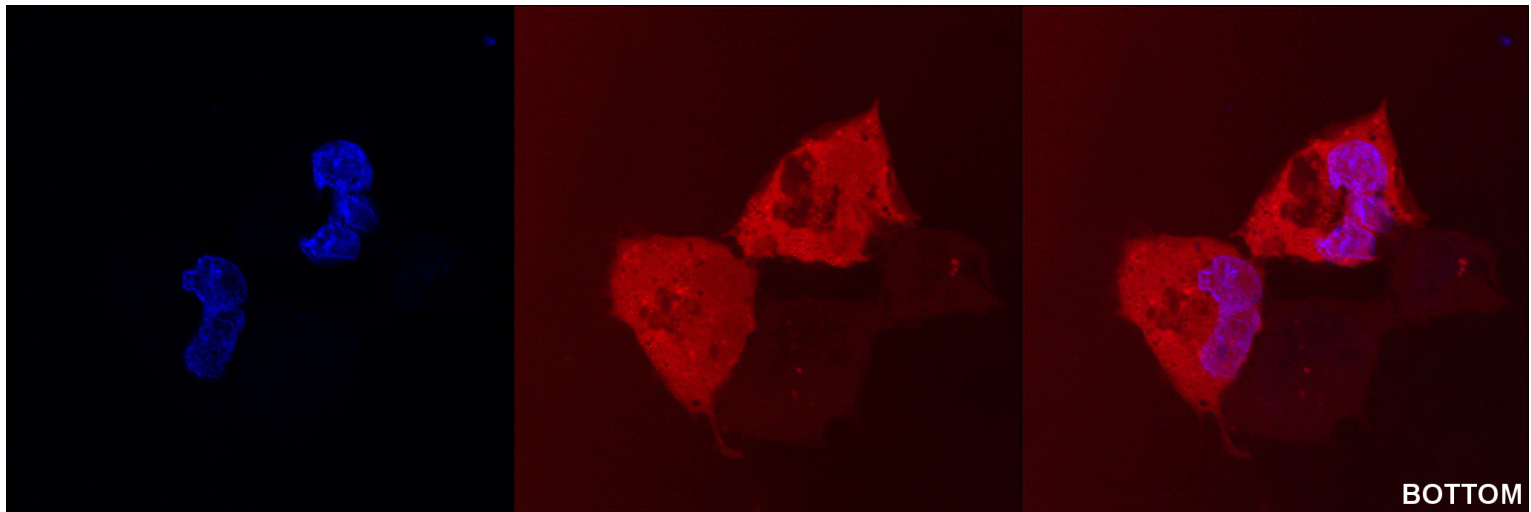

Z-stacking of laser confocal images of RhoB-PEI(1800)-cut-SWNTs in BxPC3 pancreatic cancer cells. The images were taken for DAPI for the nuclei (left) and rhodamine B for the nanotubes (center) stainings after 1 h incubation. The two images are superimposed to show that PEI(1800)-cut-SWNTs can enter the nuclei of BxPC3 pancreatic cancer cells (right).



Z-stacking of laser confocal images of RhoB-PEI(1800)-cut-SWNTs in BxPC3 pancreatic cancer cells. The images were taken for DAPI for the nuclei (left) and rhodamine B for the nanotubes (center) stainings after 1 h incubation. The two images are superimposed to show that PEI(1800)-cut-SWNTs can enter the nuclei of BxPC3 pancreatic cancer cells (right).



Z-stacking of laser confocal images of RhoB-PEI(1800)-cut-SWNTs in BxPC3 pancreatic cancer cells. The images were taken for DAPI for the nuclei (left) and rhodamine B for the nanotubes (center) stainings after 1 h incubation. The two images are superimposed to show that PEI(1800)-cut-SWNTs can enter the nuclei of BxPC3 pancreatic cancer cells (right).



Z-stacking of laser confocal images of RhoB-PEI(1800)-cut-SWNTs in BxPC3 pancreatic cancer cells. The images were taken for DAPI for the nuclei (left) and rhodamine B for the nanotubes (center) stainings after 1 h incubation. The two images are superimposed to show that PEI(1800)-cut-SWNTs can enter the nuclei of BxPC3 pancreatic cancer cells (right).



Z-stacking of laser confocal images of RhoB-PEI(1800)-cut-SWNTs in BxPC3 pancreatic cancer cells. The images were taken for DAPI for the nuclei (left) and rhodamine B for the nanotubes (center) stainings after 1 h incubation. The two images are superimposed to show that PEI(1800)-cut-SWNTs can enter the nuclei of BxPC3 pancreatic cancer cells (right).

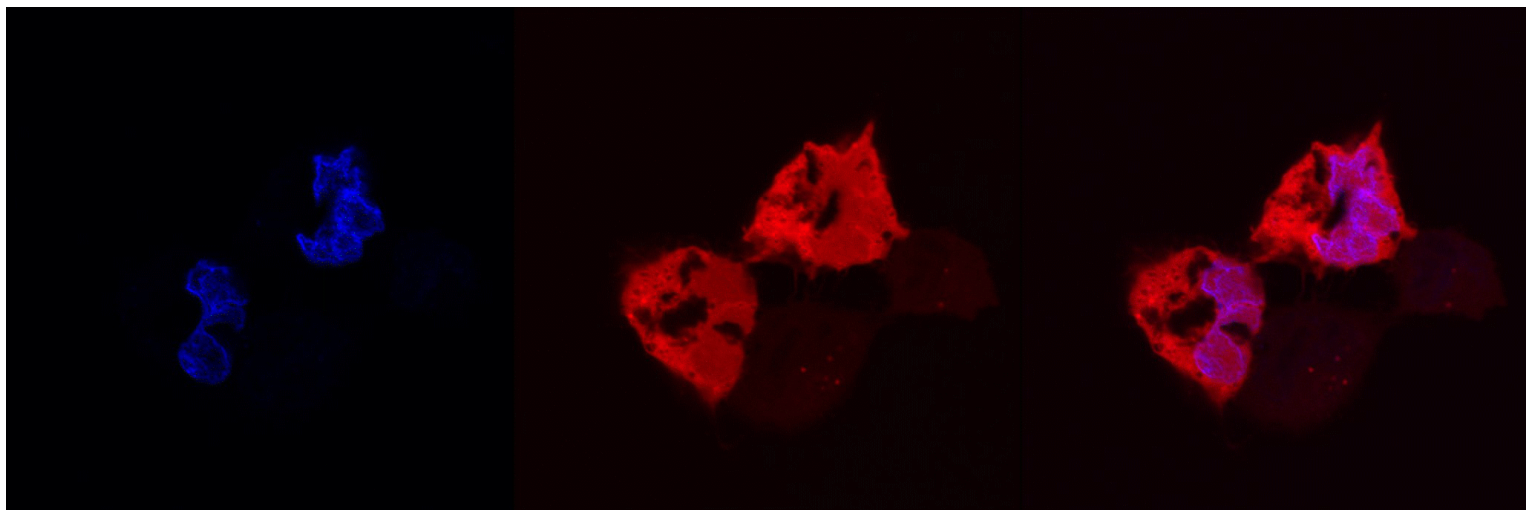

Z-stacking of laser confocal images of RhoB-PEI(1800)-cut-SWNTs in BxPC3 pancreatic cancer cells. The images were taken for DAPI for the nuclei (left) and rhodamine B for the nanotubes (center) stainings after 1 h incubation. The two images are superimposed to show that PEI(1800)-cut-SWNTs can enter the nuclei of BxPC3 pancreatic cancer cells (right).

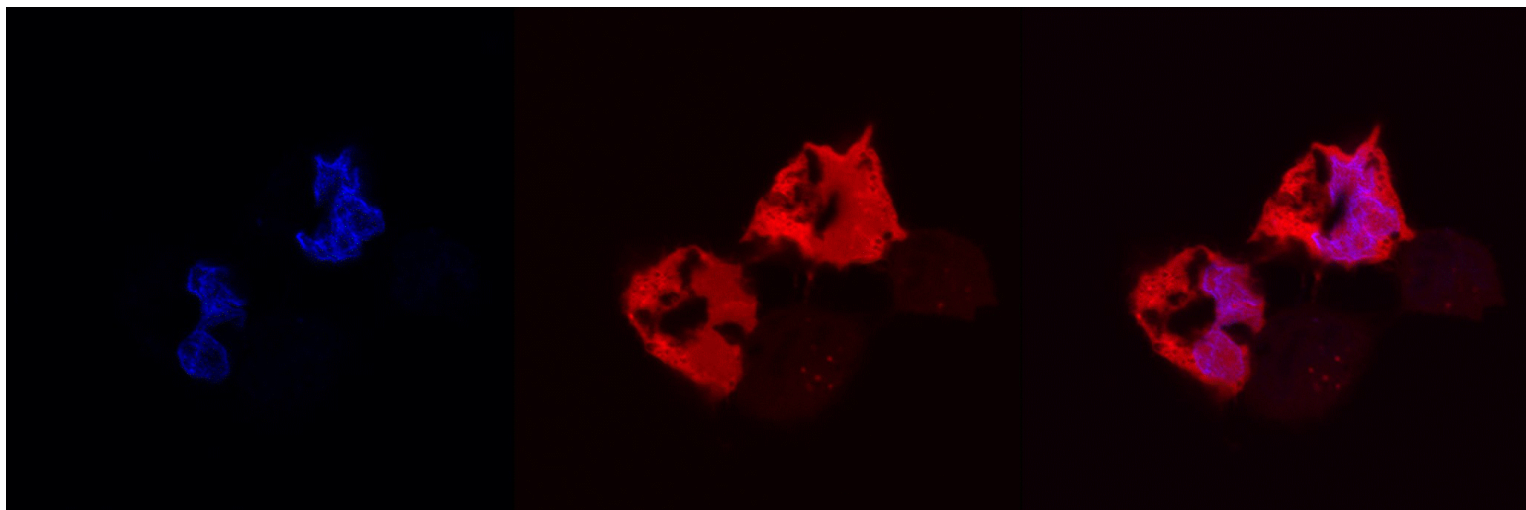

Z-stacking of laser confocal images of RhoB-PEI(1800)-cut-SWNTs in BxPC3 pancreatic cancer cells. The images were taken for DAPI for the nuclei (left) and rhodamine B for the nanotubes (center) stainings after 1 h incubation. The two images are superimposed to show that PEI(1800)-cut-SWNTs can enter the nuclei of BxPC3 pancreatic cancer cells (right).



Z-stacking of laser confocal images of RhoB-PEI(1800)-cut-SWNTs in BxPC3 pancreatic cancer cells. The images were taken for DAPI for the nuclei (left) and rhodamine B for the nanotubes (center) stainings after 1 h incubation. The two images are superimposed to show that PEI(1800)-cut-SWNTs can enter the nuclei of BxPC3 pancreatic cancer cells (right).



Z-stacking of laser confocal images of RhoB-PEI(1800)-cut-SWNTs in BxPC3 pancreatic cancer cells. The images were taken for DAPI for the nuclei (left) and rhodamine B for the nanotubes (center) stainings after 1 h incubation. The two images are superimposed to show that PEI(1800)-cut-SWNTs can enter the nuclei of BxPC3 pancreatic cancer cells (right).

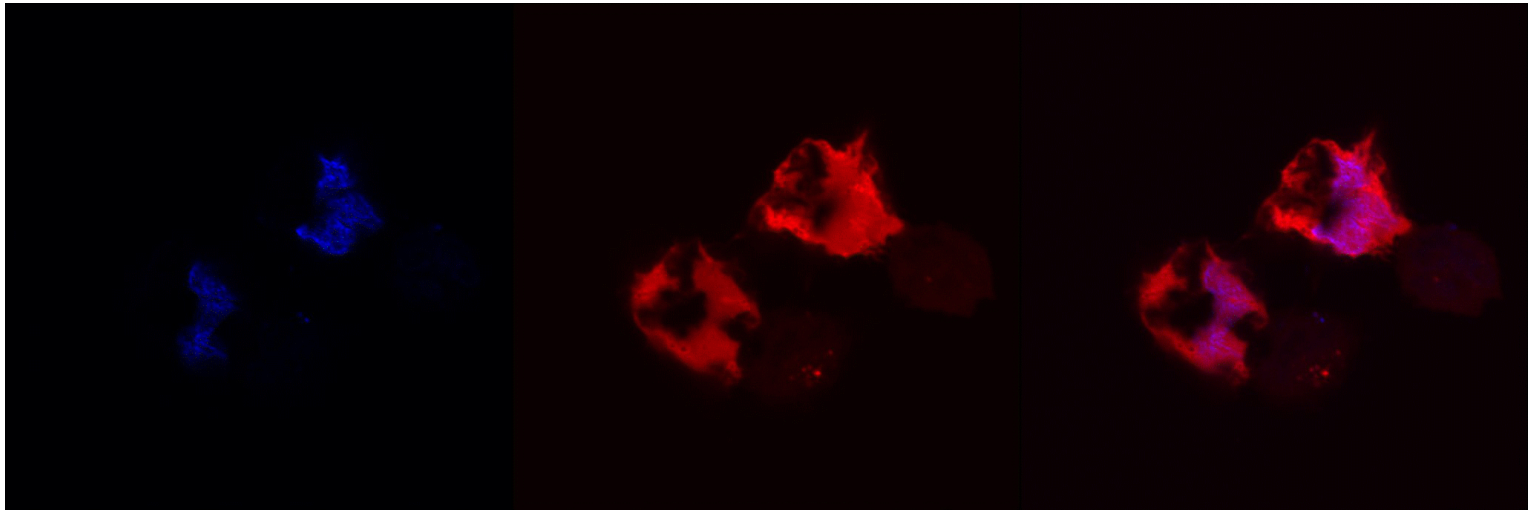

Z-stacking of laser confocal images of RhoB-PEI(1800)-cut-SWNTs in BxPC3 pancreatic cancer cells. The images were taken for DAPI for the nuclei (left) and rhodamine B for the nanotubes (center) stainings after 1 h incubation. The two images are superimposed to show that PEI(1800)-cut-SWNTs can enter the nuclei of BxPC3 pancreatic cancer cells (right).

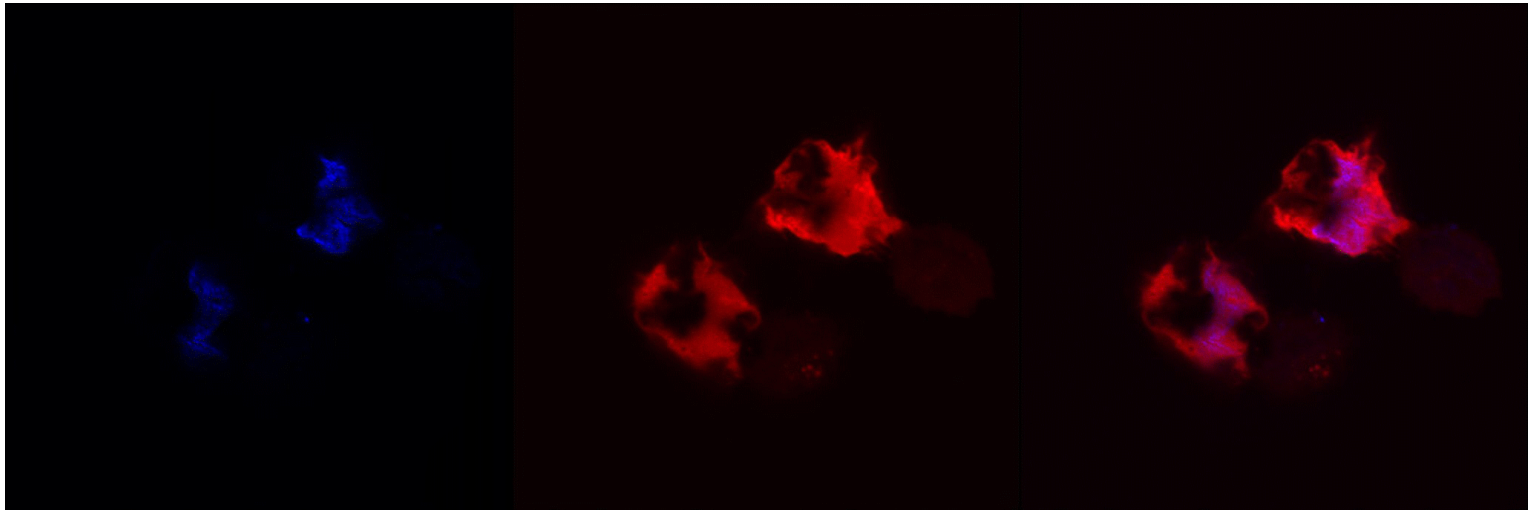

Z-stacking of laser confocal images of RhoB-PEI(1800)-cut-SWNTs in BxPC3 pancreatic cancer cells. The images were taken for DAPI for the nuclei (left) and rhodamine B for the nanotubes (center) stainings after 1 h incubation. The two images are superimposed to show that PEI(1800)-cut-SWNTs can enter the nuclei of BxPC3 pancreatic cancer cells (right).

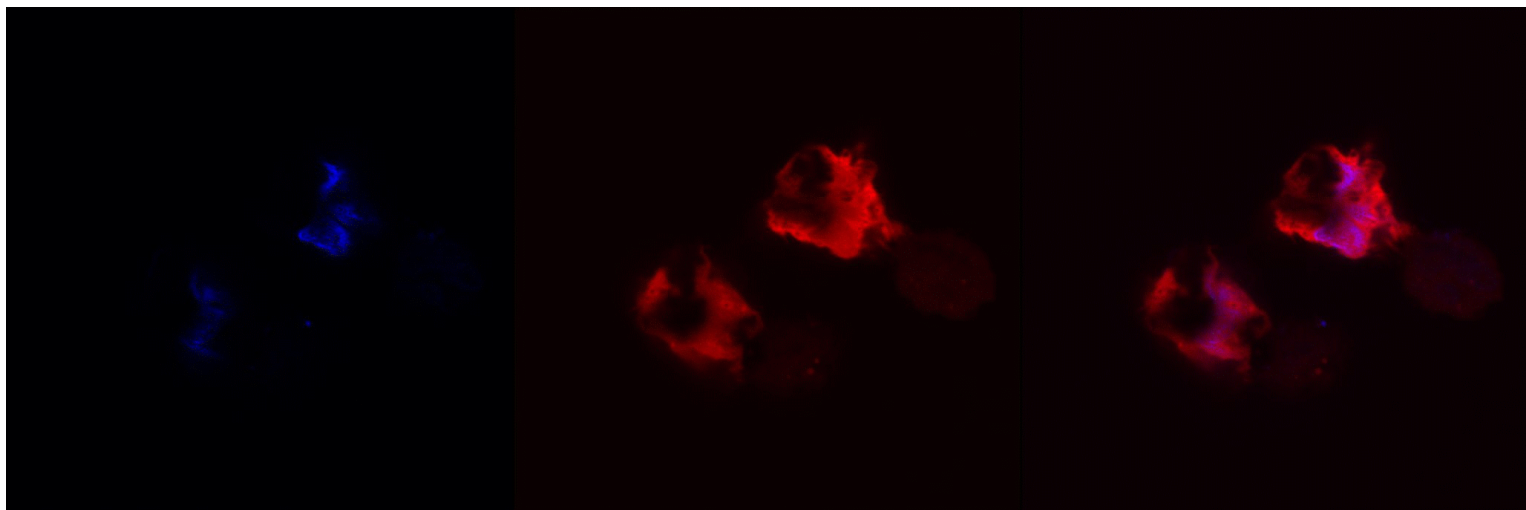

Z-stacking of laser confocal images of RhoB-PEI(1800)-cut-SWNTs in BxPC3 pancreatic cancer cells. The images were taken for DAPI for the nuclei (left) and rhodamine B for the nanotubes (center) stainings after 1 h incubation. The two images are superimposed to show that PEI(1800)-cut-SWNTs can enter the nuclei of BxPC3 pancreatic cancer cells (right).



Z-stacking of laser confocal images of RhoB-PEI(1800)-cut-SWNTs in BxPC3 pancreatic cancer cells. The images were taken for DAPI for the nuclei (left) and rhodamine B for the nanotubes (center) stainings after 1 h incubation. The two images are superimposed to show that PEI(1800)-cut-SWNTs can enter the nuclei of BxPC3 pancreatic cancer cells (right).



Z-stacking of laser confocal images of RhoB-PEI(1800)-cut-SWNTs in BxPC3 pancreatic cancer cells. The images were taken for DAPI for the nuclei (left) and rhodamine B for the nanotubes (center) stainings after 1 h incubation. The two images are superimposed to show that PEI(1800)-cut-SWNTs can enter the nuclei of BxPC3 pancreatic cancer cells (right).

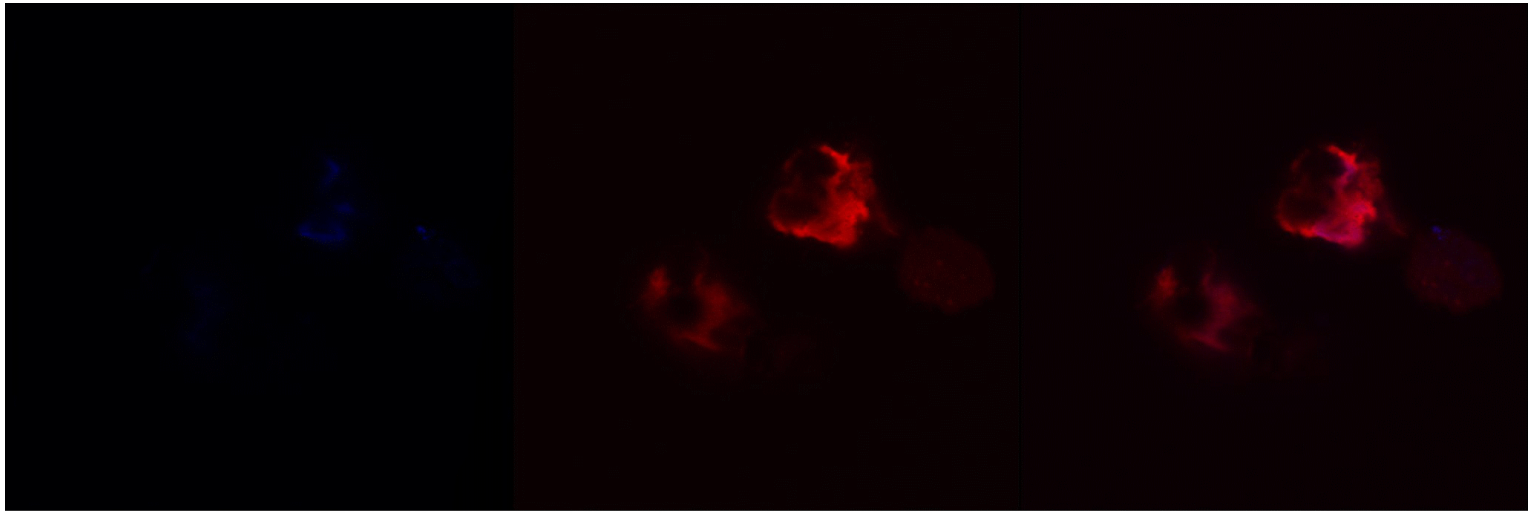

Z-stacking of laser confocal images of RhoB-PEI(1800)-cut-SWNTs in BxPC3 pancreatic cancer cells. The images were taken for DAPI for the nuclei (left) and rhodamine B for the nanotubes (center) stainings after 1 h incubation. The two images are superimposed to show that PEI(1800)-cut-SWNTs can enter the nuclei of BxPC3 pancreatic cancer cells (right).



Z-stacking of laser confocal images of RhoB-PEI(1800)-cut-SWNTs in BxPC3 pancreatic cancer cells. The images were taken for DAPI for the nuclei (left) and rhodamine B for the nanotubes (center) stainings after 1 h incubation. The two images are superimposed to show that PEI(1800)-cut-SWNTs can enter the nuclei of BxPC3 pancreatic cancer cells (right).

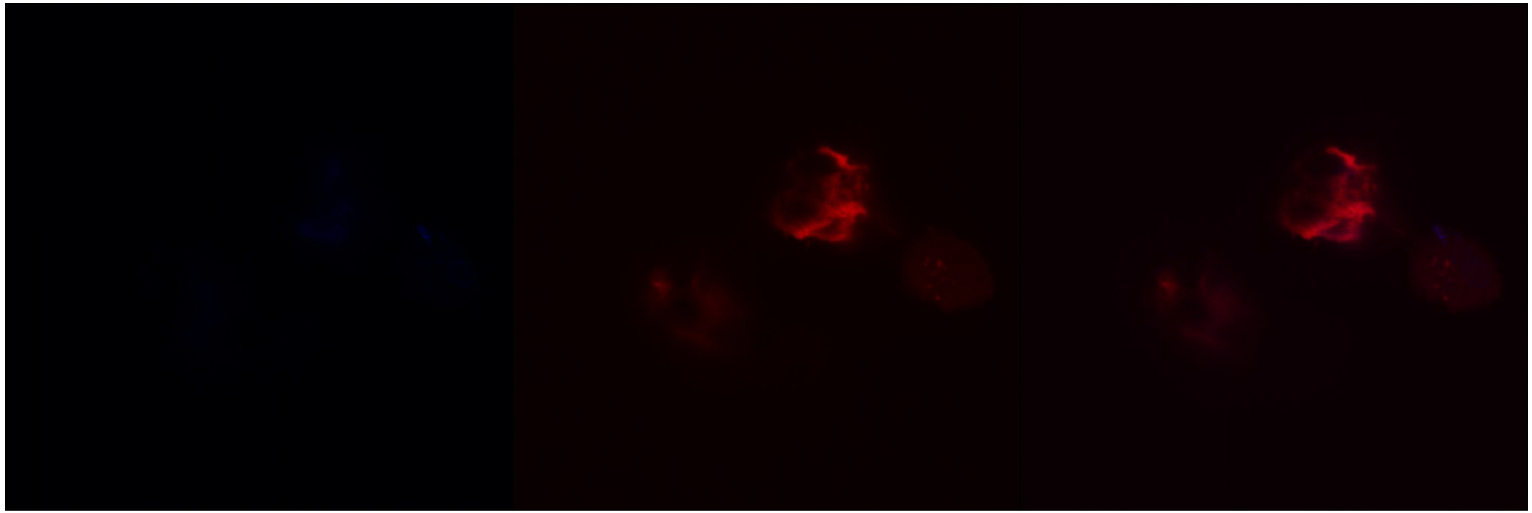

Z-stacking of laser confocal images of RhoB-PEI(1800)-cut-SWNTs in BxPC3 pancreatic cancer cells. The images were taken for DAPI for the nuclei (left) and rhodamine B for the nanotubes (center) stainings after 1 h incubation. The two images are superimposed to show that PEI(1800)-cut-SWNTs can enter the nuclei of BxPC3 pancreatic cancer cells (right).



Z-stacking of laser confocal images of RhoB-PEI(1800)-cut-SWNTs in BxPC3 pancreatic cancer cells. The images were taken for DAPI for the nuclei (left) and rhodamine B for the nanotubes (center) stainings after 1 h incubation. The two images are superimposed to show that PEI(1800)-cut-SWNTs can enter the nuclei of BxPC3 pancreatic cancer cells (right).



Z-stacking of laser confocal images of RhoB-PEI(1800)-cut-SWNTs in BxPC3 pancreatic cancer cells. The images were taken for DAPI for the nuclei (left) and rhodamine B for the nanotubes (center) stainings after 1 h incubation. The two images are superimposed to show that PEI(1800)-cut-SWNTs can enter the nuclei of BxPC3 pancreatic cancer cells (right).



Z-stacking of laser confocal images of RhoB-PEI(1800)-cut-SWNTs in BxPC3 pancreatic cancer cells. The images were taken for DAPI for the nuclei (left) and rhodamine B for the nanotubes (center) stainings after 1 h incubation. The two images are superimposed to show that PEI(1800)-cut-SWNTs can enter the nuclei of BxPC3 pancreatic cancer cells (right).
